# Supplementary material
Source: PubMed Central journal article supplement (PMC3581409)
Supplement: supp_M112.427617_jbc.M112.427617-1.pdf [file supp_M112.427617_jbc.M112.427617-1.pdf]

## SUPPLEMENTAL DATA FOR

### THE DNA REPAIR PROTEIN XRCC1 FUNCTIONS IN THE PLANT DNA DEMETHYLATION PATHWAY BY STIMULATING 5-MEC EXCISION, GAP TAILORING AND DNA LIGATION

María-Isabel Martínez-Macías, Dolores Córdoba-Cañero, Rafael R. Ariza,  
and Teresa Roldán-Arjona

*Department of Genetics, University of Córdoba/IMIBIC, 14071 Córdoba, Spain*

**Figure S1. Cell extracts from *xrcc1*<sup>-/-</sup> plants are not deficient in AP endonuclease activity.** (A) Schematic diagram of molecules used as DNA substrates in the endonuclease assay. The 51-mer double-stranded oligonucleotides contained a synthetic AP site (THF) at position 29 of the labeled upper-strand. The alexa fluor-labeled 5' end is denoted by a star. (B) DNA substrate (20 nM) was incubated with 35 µg of cell-free extract from WT, and *xrcc1*<sup>-/-</sup> mutant plants at 30°C for 3 h. Reaction products were separated in a 12% denaturing polyacrylamide gel and detected by fluorescence scanning. The panel on the right shows the percentage of incision products from two independent experiments. Values are mean ± SE from two independent experiments.

**Figure S2. Effect of anti-XRCC1 serum on mutant *xrcc1*<sup>-/-</sup> extracts.** (A) Purified ROS1 (70 nM) was incubated at 30°C for 8 h with a double-stranded oligonucleotide substrate (20 nM). Reaction products, were purified and incubated with 35 µg of cell-free extract from *xrcc1*<sup>-/-</sup> plants at 30°C for 3 h in a reaction mixture that contained increasing amounts of anti-OsXRCC1 serum (0, 2.5 and 5 µl) and either no dNTPs or all four dNTPs, as indicated. Reactions were stopped, products were digested with *HpaII*, and separated in a 12% denaturing polyacrylamide gel for detection with fluorescence scanning. (B) Percentage of fully-demethylated products. Values are mean ± SE from two independent experiments.

**Figure S3. Effect of anti-Con7 serum on 3'P-end processing and ligation of DNA demethylation intermediates catalyzed by cell extracts.** (A) Analysis of DNA incision products generated on the upper strand during DNA demethylation. Purified ROS1 (70 nM) was incubated at 30°C for 8 h with a 51-mer double-stranded oligonucleotide substrate (20 nM) containing a single 5-meC:G pair. Reaction products, which contained a mixture of β- and β,δ-elimination products (lane 1), were purified and incubated with 35 µg of cell-free extract from WT plants at 30°C for 3 h in a reaction mixture that contained increasing amounts of anti-Con7 serum (0, 2.5, 5 and 7 µl) and all four dNTPs, except when indicated. Reactions were stopped and products were separated in a 12% denaturing polyacrylamide gel and detected by fluorescence scanning. The lower panel shows the percentage of 3'-P not converted into 3'-OH in two independent experiments. (B) DNA ligation assay. DNA duplexes containing a nick in the upper, 5'-alexa fluor labeled strand were incubated with 35 µg of extract from WT plants at 30°C for 3 h in a reaction mixture supplemented with increasing amounts of anti-Con7 serum (0, 2.5, 5 and 7 µl) and all four dNTPs, except when indicated. Reaction products were separated using a 12% denaturing polyacrylamide gel and detected by fluorescence scanning. The lower panel shows the percentage of fully-ligated products. Values are mean ± SE from two independent experiments.

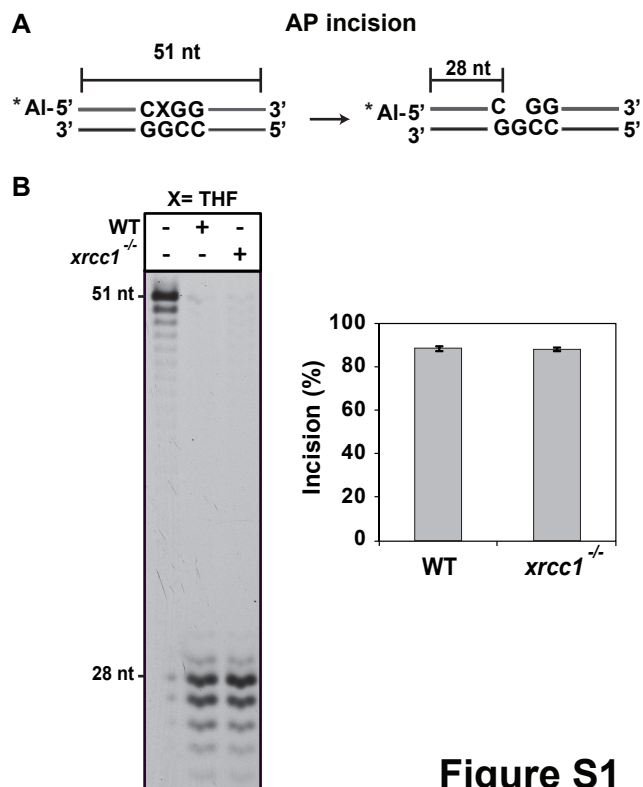

Figure S1

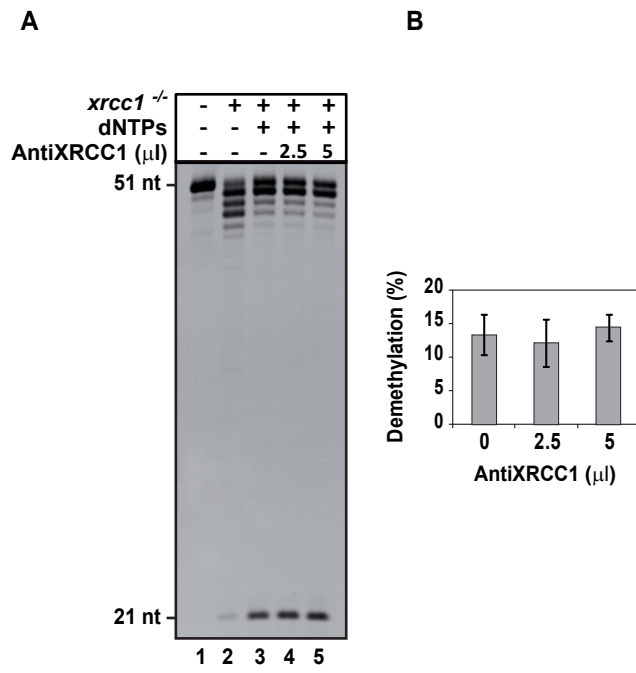**Figure S2**

**A**

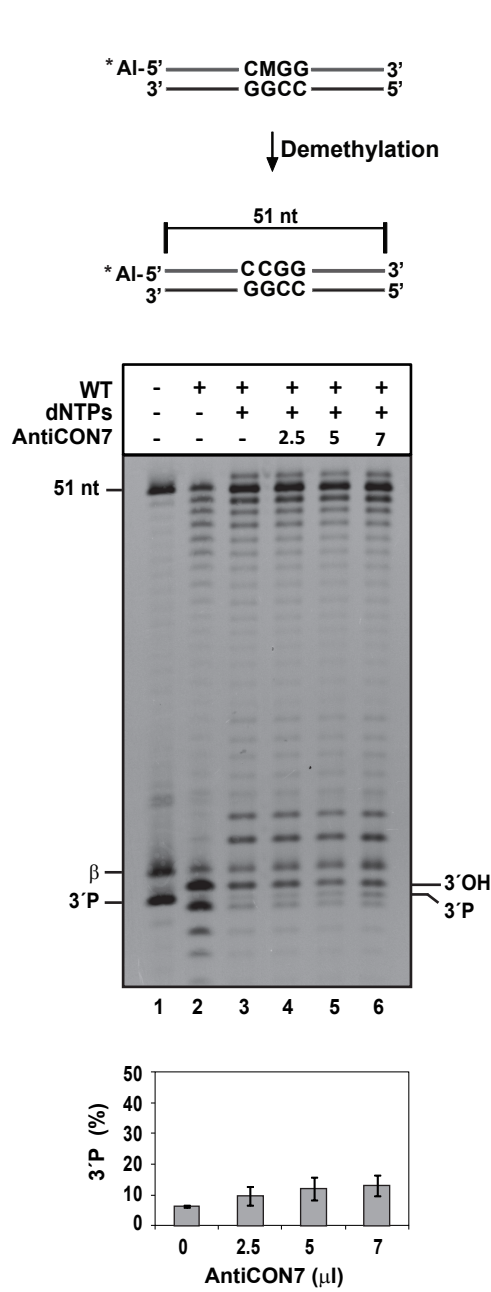

**B**

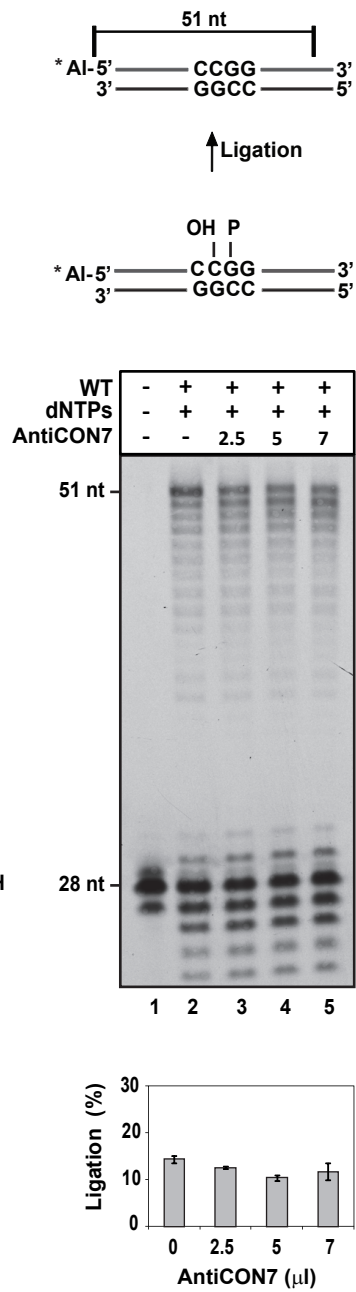

**Figure S3**
